# Supplementary material for: Concomitant Deep Vein Thrombosis in Cancer Patients with Unsuspected Pulmonary Embolism
Source: MDPI journal article supplement (doi:10.3390/cancers14184510), 2022-09-17
Supplement: s1 [file s1]

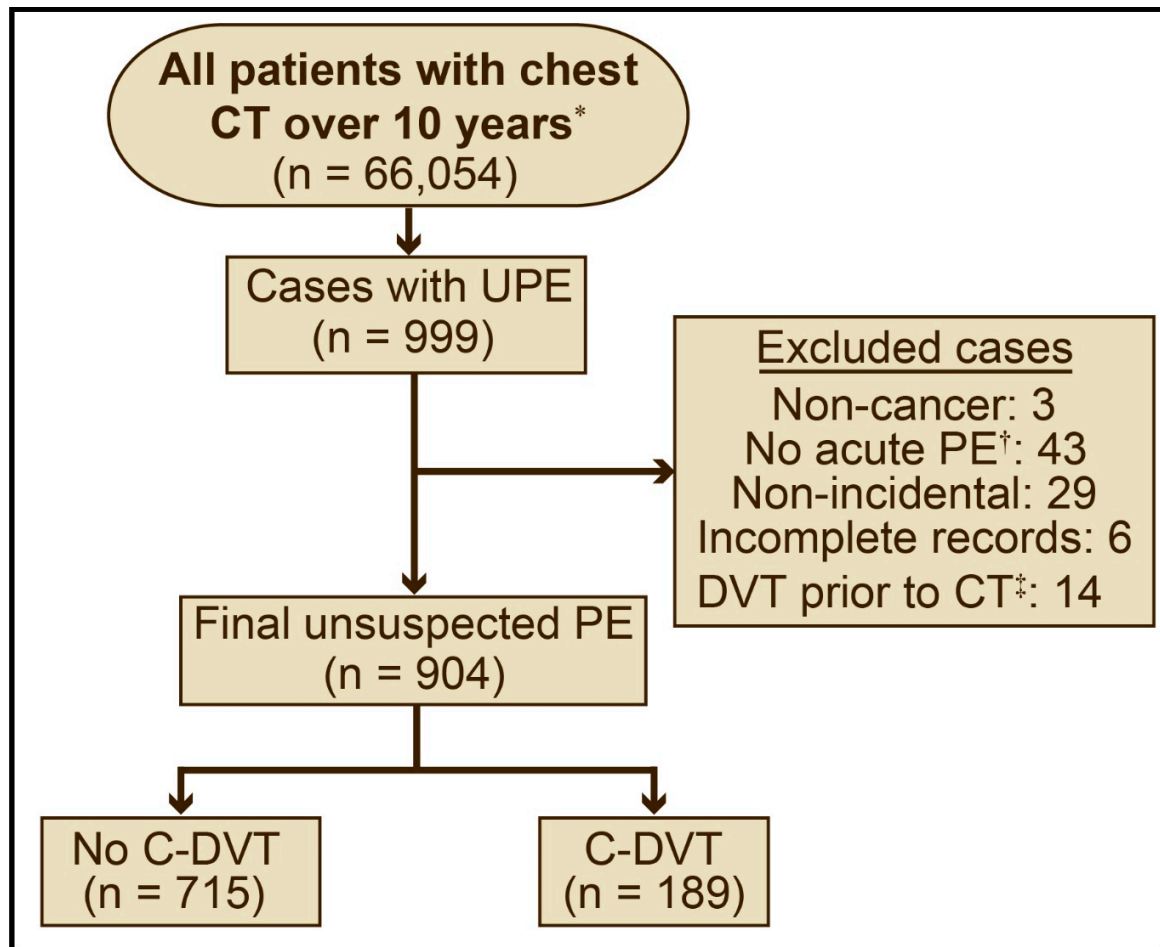

**Figure S1. Flow chart of study eligibility.** Abbreviations: UPE, unsuspected or incidental pulmonary embolisms; DVT, deep vein thrombosis; CT, computed tomography; C-DVT, concomitant deep vein thrombosis. \* CT chest with intravenous contrast excluding CT pulmonary angiogram or CT PE protocol which are usually ordered for suspected PEs †Indicates absence of acute incidental PE (i.e., absence of true filling defects in the pulmonary arterial tree or pulmonary arterial filling defects were attributed to chronic PE or tumor thrombus). ‡Indicates prior diagnosis of DVT within one month before incidental PE discovery.

**Table S1.** Symptoms' characteristics related to concomitant deep vein thrombosis in cancer patients with unsuspected pulmonary embolism at the time of deep vein thrombosis diagnosis

| <b>Symptoms</b>             | <b>No. of patients (%)</b> |
|-----------------------------|----------------------------|
| None (asymptomatic)         | 156 (82.5)                 |
| Extremity swelling          | 23 (12.2)                  |
| Extremity pain and swelling | 5 (2.6)                    |
| Extremity pain              | 5 (2.6)                    |

**Table S2.** Presence of concomitant deep vein thrombosis in cancer patients with an unsuspected pulmonary embolism (PE), stratified by location of the incidental PE (n = 904).

| <b>Incidental PE location</b> | <b>Concomitant deep vein thrombosis</b> |            |                   | <b>P</b> |
|-------------------------------|-----------------------------------------|------------|-------------------|----------|
|                               | <b>No</b>                               | <b>Yes</b> | <b>Percentage</b> |          |
| Subsegmental/segmental        | 261                                     | 53         | 16.9              | 0.004    |
| Lobar/interlobar              | 300                                     | 74         | 19.8              |          |
| Main/saddle                   | 154                                     | 62         | 28.7              |          |

**Table S3.** Management for cancer patients with unsuspected/incidental pulmonary embolism (n = 904) at discharge, stratified by the presence of concomitant deep vein thrombosis.

| <b>Treatment</b> | <b>Concomitant deep vein thrombosis</b> |            | <b>P</b> |
|------------------|-----------------------------------------|------------|----------|
|                  | <b>No</b>                               | <b>Yes</b> |          |
| Anticoagulants   | 661 (92.4)                              | 163 (86.2) | 0.002    |
| IVC filter only  | 31 (4.3)                                | 21 (11.1)  |          |
| None             | 23 (3.2)                                | 5 (2.6)    |          |

Abbreviations: IVC, inferior vena cava.

**Table S4.** Univariate and multivariable logistic regression analyses of clinical factors associated with venous thromboembolism recurrence within 6 months in cancer patients with unsuspected pulmonary embolism who were discharged with anticoagulants (n = 824).

| Variable                   | Univariate       |              | Multivariable    |              |
|----------------------------|------------------|--------------|------------------|--------------|
|                            | OR (95% CI)      | P            | OR (95% CI)      | P            |
| Age                        | 0.98 (0.96-1.00) | <b>0.024</b> | 0.97 (0.95-0.99) | <b>0.007</b> |
| CCI                        | 0.91 (0.81-1.02) | 0.114        | -                | -            |
| Site of cancer*            |                  |              |                  |              |
| Low risk                   |                  | Reference    |                  |              |
| High risk                  | 2.21 (1.27-3.93) | <b>0.006</b> | 2.49 (1.41-4.48) | <b>0.002</b> |
| Very high risk             | 2.52 (1.02-5.71) | <b>0.033</b> | 2.54 (1.01-5.84) | <b>0.034</b> |
| Cancer stage               |                  |              |                  |              |
| Local                      |                  | Reference    |                  |              |
| Advanced                   | 2.71 (1.09-9.06) | 0.058        | -                | -            |
| Time from cancer diagnosis | 1.00 (0.99-1.01) | 0.964        | -                | -            |
| C-DVT                      |                  |              |                  |              |
| No                         |                  | Reference    |                  |              |
| Yes                        | 2.24 (1.26-3.86) | <b>0.005</b> | 2.27 (1.27-3.96) | <b>0.005</b> |

Abbreviations: OR, odds ratio; CI, confidence interval; CCI, Charlson comorbidity index, C-DVT; concomitant deep vein thrombosis.

\* Site of cancer grouping based on VTE risk: Very high risk (stomach, pancreas, primary brain tumor); high risk (lung, lymphoma, gynecologic, bladder, testicular, and renal tumors); low risk (all other tumors).

**Table S5.** Univariate and multivariable logistic regression analyses of clinical factors associated with venous thromboembolism recurrence within 6 months in cancer patients with peripheral unsuspected pulmonary embolism.

| Variable                   | Univariate        |              | Multivariable    |              |
|----------------------------|-------------------|--------------|------------------|--------------|
|                            | OR (95% CI)       | P            | OR (95% CI)      | P            |
| Age                        | 0.97 (0.95-0.99)  | <b>0.009</b> | 0.97 (0.94-0.99) | <b>0.005</b> |
| CCI                        | 1.01 (0.88-1.17)  | 0.882        | -                | -            |
| Site of cancer*            |                   |              |                  |              |
| Low risk                   |                   | Reference    |                  |              |
| High risk                  | 1.79 (0.91-3.57)  | 0.094        | 1.98 (0.99-4.01) | 0.053        |
| Very high risk             | 2.18 (0.76-5.56)  | 0.118        | 2.11 (0.72-5.52) | 0.144        |
| Cancer stage               |                   |              |                  |              |
| Local                      |                   | Reference    |                  |              |
| Advanced                   | 2.43 (0.86-10.18) | 0.145        | -                | -            |
| Time from cancer diagnosis | 1.00 (0.98-1.01)  | 0.500        | -                | -            |
| C-DVT                      |                   |              |                  |              |
| No                         |                   | Reference    |                  |              |
| Yes                        | 2.67 (1.34-5.13)  | <b>0.004</b> | 2.59 (1.29-5.05) | <b>0.006</b> |

Abbreviations: OR, odds ratio; CI, confidence interval; CCI, Charlson comorbidity index; C-DVT; concomitant deep vein thrombosis.

\* Site of cancer grouping based on VTE risk: Very high risk (stomach, pancreas, primary brain tumor); high risk (lung, lymphoma, gynecologic, bladder, testicular, and renal tumors); low risk (all other tumors).

**Table S6.** Short-term mortality rates for cancer patients with unsuspected pulmonary embolism with or without concomitant deep vein thrombosis (n = 904).

| <b>Mortality</b> | <b>Concomitant deep vein thrombosis, no. (%)</b> |                  | <b><i>P</i></b>  |
|------------------|--------------------------------------------------|------------------|------------------|
|                  | <b>Yes, n=189</b>                                | <b>No, n=715</b> |                  |
| 15 days          | 15 (7.9)                                         | 31 (4.3)         | <b>0.045</b>     |
| 30 days          | 29 (15.3)                                        | 61 (8.5)         | <b>0.005</b>     |
| 90 days          | 62 (32.8)                                        | 139 (19.4)       | <b>&lt;0.001</b> |
